# Supplementary material
Source: publisher figshare collection journal article supplement (https://gsajournals.figshare.com/articles/dataset/_/15060894)
Supplement: Supplementary file 1 [file 1]

## Supplemental Material

### Intermittent fasting and caloric restriction interact with genetics to shape physiological health in mice

#### Authors

Guozhu Zhang, Andrew Deighan, Anil Raj, Laura Robinson, Hannah J. Donato, Gaven Garland, Mackenzie Leland, Baby Martin-McNulty, Ganesh A. Kolumam, Johannes Riegler, Adam Freund, Kevin M. Wright, Gary A. Churchill

#### Heritability analysis model details

We estimated heritability by fitting the Bayesian model  $Y = X\beta + \epsilon$  where  $\epsilon$  follows multivariate normal distribution with mean 0 and covariance matrix  $\sigma^2(2h^2K + (1 - h^2)I)$  where  $\sigma^2$  is the total phenotypic variance,  $h^2$  is heritability,  $K$  is the kinship matrix and  $I$  is identity matrix. The prior information is as follows:

$$\sigma^2 \sim \text{InverseGamma}(1, 0.5)$$

$$h^2 \sim \text{Uniform}(0, 1)$$

$$\beta \sim \text{MultivariateNormal}(M, \Sigma)$$

where  $M = [0, 0, 0, 0, 0]$  and  $\Sigma = 2I_{5 \times 5}$ .

#### Genetic correlation analysis model details

Considering two traits  $Y_1$  and  $Y_2$ , we estimated genetic correlation by fitting the Bayesian model:  $\begin{bmatrix} Y_1 \\ Y_2 \end{bmatrix} = \begin{bmatrix} X\beta_1 \\ X\beta_2 \end{bmatrix} + \epsilon$ , where  $\epsilon$  follows multivariate normal distribution with mean 0 and covariance matrix  $\begin{bmatrix} 2\sigma_{g1}^2K + \sigma_{e1}^2I & 2\gamma\sigma_{g1}\sigma_{g2}K + \lambda\sigma_{g1}\sigma_{g2}I \\ 2\gamma\sigma_{g1}\sigma_{g2}K + \lambda\sigma_{g1}\sigma_{g2}I & 2\sigma_{g2}^2K + \sigma_{e2}^2I \end{bmatrix}$  where  $K$  is the kinship matrix;  $I$  is the identity matrix;  $\sigma_{g1}^2$  and  $\sigma_{e1}^2$  are genetic and environmental variance for trait  $Y_1$  respectively;  $\sigma_{g2}^2$  and  $\sigma_{e2}^2$  are genetic and environmental variance for trait  $Y_2$  respectively;  $\gamma$  is genetic correlation and  $\lambda$  represents the correlation due to an individual's environment. The prior information is as follows:

$$\gamma, \lambda \sim \text{Uniform}(-1, 1)$$

$$\beta_1, \beta_2 \sim \text{MultivariateNormal}(M, \Sigma)$$

where  $M = [0, 0, 0, 0, 0]$  and  $\Sigma = 2I_{5 \times 5}$ .  $\sigma_{g1}^2$ ,  $\sigma_{g2}^2$ ,  $\sigma_{e1}^2$  and  $\sigma_{e2}^2$  are estimated by fitting each trait individually with diet as fix effect and kinship as random effect using maximum likelihood method.

| Phenotyping Procedure               | Trait   | AL  | 1D  | 2D  | 20  | 40  | Total |
|-------------------------------------|---------|-----|-----|-----|-----|-----|-------|
| Rotarod (RR)                        | RR_FIRS | 153 | 176 | 184 | 154 | 163 | 830   |
|                                     | RR_SLOP | 153 | 176 | 184 | 154 | 163 | 830   |
|                                     | RR_TAVG | 153 | 176 | 184 | 154 | 163 | 830   |
| Grip strength (GS)                  | GS_APAW | 185 | 176 | 184 | 184 | 178 | 907   |
|                                     | GS_FORE | 182 | 176 | 184 | 183 | 178 | 903   |
| Echocardiogram (EC)                 | EC_COUT | 180 | 172 | 180 | 182 | 171 | 885   |
|                                     | EC_EFRA | 180 | 172 | 180 | 182 | 171 | 885   |
|                                     | EC_HRAT | 180 | 172 | 180 | 182 | 171 | 885   |
|                                     | EC_IVSD | 180 | 172 | 180 | 182 | 169 | 883   |
|                                     | EC_IVSS | 180 | 172 | 180 | 182 | 171 | 885   |
|                                     | EC_LVID | 180 | 172 | 180 | 182 | 171 | 885   |
|                                     | EC_LVIS | 180 | 172 | 180 | 182 | 171 | 885   |
|                                     | EC_LVMA | 180 | 172 | 179 | 182 | 169 | 882   |
|                                     | EC_LVPD | 180 | 172 | 179 | 182 | 170 | 883   |
|                                     | EC_LVPS | 180 | 172 | 180 | 181 | 171 | 884   |
|                                     | EC_STRO | 180 | 172 | 180 | 181 | 171 | 884   |
|                                     | DX_BARE | 185 | 171 | 177 | 184 | 176 | 893   |
|                                     | DX_BODY | 185 | 171 | 177 | 184 | 176 | 893   |
| Dual-energy X-ray absorptiometry    | DX_BOMC | 185 | 171 | 177 | 184 | 176 | 893   |
|                                     | DX_BOMD | 184 | 171 | 177 | 184 | 176 | 892   |
|                                     | DX_PFAT | 185 | 171 | 177 | 184 | 176 | 893   |
|                                     | DX_SIZE | 185 | 171 | 176 | 184 | 175 | 891   |
|                                     | DX_TARE | 185 | 171 | 177 | 184 | 176 | 893   |
|                                     | DX_TTME | 185 | 171 | 177 | 184 | 176 | 893   |
|                                     | YM_DIST | 174 | 149 | 154 | 172 | 167 | 816   |
| Y-maze spontaneous alternation (YM) | YM_ENTR | 174 | 149 | 154 | 172 | 165 | 814   |
|                                     | YM_EPIS | 175 | 149 | 154 | 172 | 167 | 817   |
|                                     | YM_MAXS | 174 | 149 | 153 | 170 | 166 | 812   |
|                                     | YM_PALT | 175 | 147 | 154 | 172 | 166 | 814   |
|                                     | YM_TIME | 175 | 149 | 154 | 172 | 167 | 817   |
| Acoustic startle (AS)               | AS_SLOP | 127 | 138 | 136 | 129 | 122 | 652   |
|                                     | AS_TAUC | 138 | 143 | 148 | 135 | 142 | 706   |
|                                     | AS_XINF | 132 | 141 | 141 | 134 | 131 | 679   |
|                                     | AS_YINF | 133 | 141 | 140 | 134 | 131 | 679   |
| Wheel running (WR)                  | WR_DDAY | 178 | 170 | 173 | 178 | 167 | 866   |
|                                     | WR_DIST | 182 | 173 | 176 | 183 | 174 | 888   |
|                                     | WR_DNIG | 182 | 173 | 176 | 183 | 177 | 891   |
|                                     | WR_MDAY | 181 | 172 | 177 | 179 | 175 | 884   |
|                                     | WR_MNIG | 182 | 173 | 178 | 183 | 178 | 894   |
|                                     | WR_MSPE | 181 | 171 | 178 | 182 | 176 | 888   |
|                                     | WR_TDAY | 181 | 172 | 177 | 182 | 172 | 884   |
|                                     | WR_TNIG | 182 | 174 | 178 | 183 | 178 | 895   |

**Table S1** Total number of samples per trait and per diet after outlier removal.

| Cluster size | Threshold |
|--------------|-----------|
| 2            | 0.55      |
| 3            | 0.59      |
| 4            | 0.64      |
| 5            | 0.66      |
| 6            | 0.68      |
| 7            | 0.71      |
| 8            | 0.71      |
| 9            | 0.75      |
| 10           | 0.73      |
| 11           | 0.75      |
| 12           | 0.75      |
| 13           | 0.76      |
| 14           | 0.77      |
| 15           | 0.79      |

**Table S2** Significance threshold for unsupervised hierarchical clustering analysis.

| Cluster           | Trait (s)                                     | Description                          | PC Trait Abbreviation |
|-------------------|-----------------------------------------------|--------------------------------------|-----------------------|
|                   | 1 EC_LVPD, EC_LVPS                            | ECHO 1.- LV posterior wall thickness | PC_ECL                |
|                   | 2 EC_IVSD, EC_IVSS                            | ECHO 2.- IV septum thickness         | PC_ECI                |
|                   | 3 EC_EFRA, EC_LVIS                            | ECHO 3.- ejection fraction           | PC_ECE                |
|                   | 4 RR_FIRS, RR_SLOP, RR_TAVG                   | rotarod                              | PC_ROR                |
|                   | 5 DX_BARE, DX_BOMC, DX_BOMD                   | DEXA i.- bone composition            | PC_DXB                |
|                   | 6 AS_TAUC, AS_YINF                            | Hearing                              | PC_DXB                |
|                   | 7 EC_COUT, EC_LVID, EC_LVMA, EC_STRO          | ECHO 4.- heart output                | PC_ECC                |
|                   | 8 WR_DDAY, WR_MDAY, WR_TDAY                   | Wheel Run 1.-day                     | PC_WRD                |
|                   | 9 DX_BODY, DX_PFAT, DX_TARE, DX_TTME          | DEXA ii.- body composition           | PC_DXS                |
|                   | 10 WR_DIST, WR_DNIG, WR_MNIG, WR_MSPE, WR_TNI | Wheel Run 2. - night                 | PC_WRN                |
| <b>Singletons</b> |                                               |                                      |                       |
|                   | 1 EC_HRAT                                     | ECHO - heart rate                    |                       |
|                   | 2 AS_XINF                                     | Hearing - model fit, x intercept     |                       |
|                   | 3 GS_APAW                                     | Grip Strength - All Paw              |                       |
|                   | 4 GS_FORE                                     | Grip Strength - Fore Paw             |                       |
|                   | 5 AS_SLOP                                     | Hearing - model fit, slope           |                       |
|                   | 6 DX_SIZE                                     | DEXA - body length                   |                       |

**Table S3 Principal component derived trait descriptions.** For trait groups identified in hierarchical clustering analysis, we list the directly measured and the principal component derived traits.

|                                      | Diet  | Model                                                                                                                                                                                                                                                   | LOD_model_I<br>-<br>LOD_model_II |
|--------------------------------------|-------|---------------------------------------------------------------------------------------------------------------------------------------------------------------------------------------------------------------------------------------------------------|----------------------------------|
| PC_ECE2<br><br>Chr16:<br>UNC26651633 | 1D    | Model I: $Y = \text{Diet} + G + \text{Diet1D} * G + \text{Diet20} * G + \text{Diet2D} * G + \text{Diet40} * G + \text{Kinship} + E$<br>Model II: $Y = \text{Diet} + G + \text{Diet2D} * G + \text{Diet20} * G + \text{Diet40} * G + \text{Kinship} + E$ | 3.4                              |
|                                      | 20    | Model II: $Y = \text{Diet} + G + \text{Diet1D} * G + \text{Diet2D} * G + \text{Diet40} * G + \text{Kinship} + E$                                                                                                                                        | 7.2                              |
|                                      | 2D    | Model II: $Y = \text{Diet} + G + \text{Diet1D} * G + \text{Diet20} * G + \text{Diet40} * G + \text{Kinship} + E$                                                                                                                                        | 7.7                              |
|                                      | 40    | Model II: $Y = \text{Diet} + G + \text{Diet1D} * G + \text{Diet20} * G + \text{Diet2D} * G + \text{Kinship} + E$                                                                                                                                        | 1.8                              |
|                                      | 1D/20 | Model II: $Y = \text{Diet} + G + \text{Diet2D} * G + \text{Diet40} * G + \text{Kinship} + E$                                                                                                                                                            | 8.1                              |
|                                      | 20/2D | Model II: $Y = \text{Diet} + G + \text{Diet1D} * G + \text{Diet40} * G + \text{Kinship} + E$                                                                                                                                                            | 11.6                             |
|                                      | 20/40 | Model II: $Y = \text{Diet} + G + \text{Diet1D} * G + \text{Diet2D} * G + \text{Kinship} + E$                                                                                                                                                            | 8.9                              |
| AS_YINF<br><br>Chr9:<br>UNC16962149  | 1D    | Model I: $Y = \text{Diet} + G + \text{Diet1D} * G + \text{Diet20} * G + \text{Diet2D} * G + \text{Diet40} * G + \text{Kinship} + E$<br>Model II: $Y = \text{Diet} + G + \text{Diet2D} * G + \text{Diet20} * G + \text{Diet40} * G + \text{Kinship} + E$ | 3.6                              |
|                                      | 20    | Model II: $Y = \text{Diet} + G + \text{Diet1D} * G + \text{Diet2D} * G + \text{Diet40} * G + \text{Kinship} + E$                                                                                                                                        | 0.7                              |
|                                      | 2D    | Model II: $Y = \text{Diet} + G + \text{Diet1D} * G + \text{Diet20} * G + \text{Diet40} * G + \text{Kinship} + E$                                                                                                                                        | 3.9                              |
|                                      | 40    | Model II: $Y = \text{Diet} + G + \text{Diet1D} * G + \text{Diet20} * G + \text{Diet2D} * G + \text{Kinship} + E$                                                                                                                                        | 4.8                              |
|                                      | 1D/40 | Model II: $Y = \text{Diet} + G + \text{Diet20} * G + \text{Diet2D} * G + \text{Kinship} + E$                                                                                                                                                            | 8.9                              |
|                                      | 20/40 | Model II: $Y = \text{Diet} + G + \text{Diet1D} * G + \text{Diet2D} * G + \text{Kinship} + E$                                                                                                                                                            | 7.3                              |
|                                      | 2D/40 | Model II: $Y = \text{Diet} + G + \text{Diet1D} * G + \text{Diet20} * G + \text{Kinship} + E$                                                                                                                                                            | 7.2                              |
| PC_ECL1*<br><br>Chr2:<br>JAX00486864 | 1D    | Model I: $Y = \text{Diet} + G + \text{Diet1D} * G + \text{Diet20} * G + \text{Diet2D} * G + \text{Diet40} * G + \text{Kinship} + E$<br>Model II: $Y = \text{Diet} + G + \text{Diet2D} * G + \text{Diet20} * G + \text{Diet40} * G + \text{Kinship} + E$ | 6.2                              |
|                                      | 20    | Model II: $Y = \text{Diet} + G + \text{Diet1D} * G + \text{Diet2D} * G + \text{Diet40} * G + \text{Kinship} + E$                                                                                                                                        | 5.6                              |
|                                      | 2D    | Model II: $Y = \text{Diet} + G + \text{Diet1D} * G + \text{Diet20} * G + \text{Diet40} * G + \text{Kinship} + E$                                                                                                                                        | 1.8                              |
|                                      | 40    | Model II: $Y = \text{Diet} + G + \text{Diet1D} * G + \text{Diet20} * G + \text{Diet2D} * G + \text{Kinship} + E$                                                                                                                                        | 1.8                              |
|                                      | 1D/20 | Model II: $Y = \text{Diet} + G + \text{Diet2D} * G + \text{Diet40} * G + \text{Kinship} + E$                                                                                                                                                            | 11.9                             |
|                                      | 1D/2D | Model II: $Y = \text{Diet} + G + \text{Diet20} * G + \text{Diet40} * G + \text{Kinship} + E$                                                                                                                                                            | 9.4                              |
|                                      | 1D/40 | Model II: $Y = \text{Diet} + G + \text{Diet20} * G + \text{Diet2D} * G + \text{Kinship} + E$                                                                                                                                                            | 8.0                              |

\*Note: EC\_LVPD (Chr2: UNCHS004526) has the same pattern as PC\_ECL1.

**Table S4 Reduced genotype x diet association model test.** For each lead marker at a GxD interaction QTL, we compare the LOD scores of full (Model I) and reduced (Model II) genetic association models. Reduced models test the effect of four, non AL diets in isolation, and for the single diet with the maximum difference between Model I and Model II LOD score, the three possible two diet combinations are also tested.

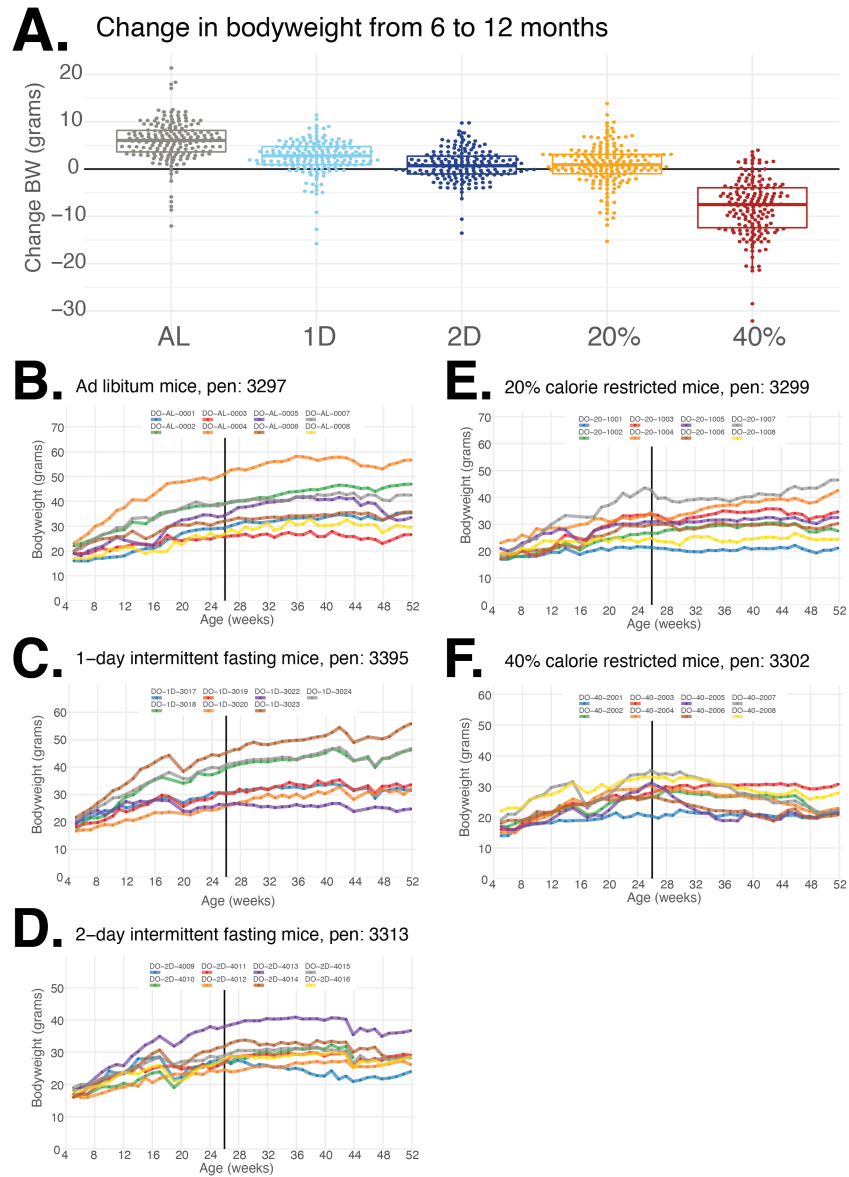

**Figure S1 Change in body weight following dietary intervention.** A. Diet-specific change in body weight after six months of intervention. Dots show values for individual mice. Box plots show median, 25% and 75% quantiles. B-F. Weekly body weight values for group housed mice in a single representative pen for each dietary intervention.

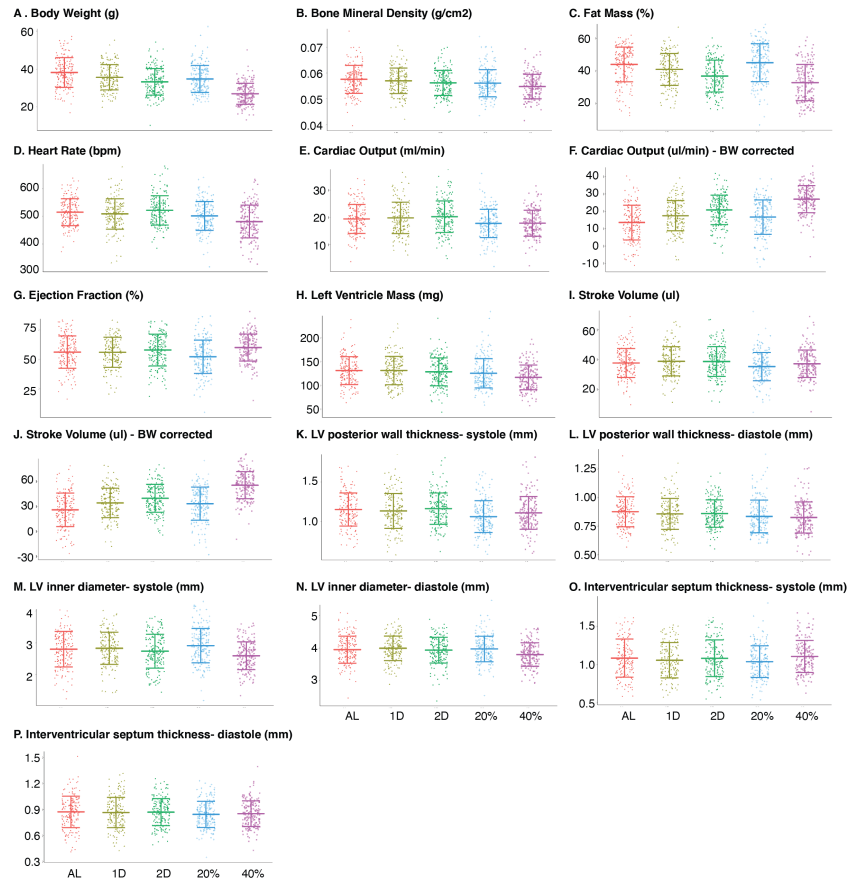

**Figure S2 Diet specific trait values for DEXA and echocardiogram assays.** Horizontal bars display Mean  $\pm$  SD. For cardiac output (EC\_COUT) and stroke volume (EC\_STRO) we present the raw values and body weight corrected values (calculated following the grip strength and rotarod specific analyses described in Methods.)

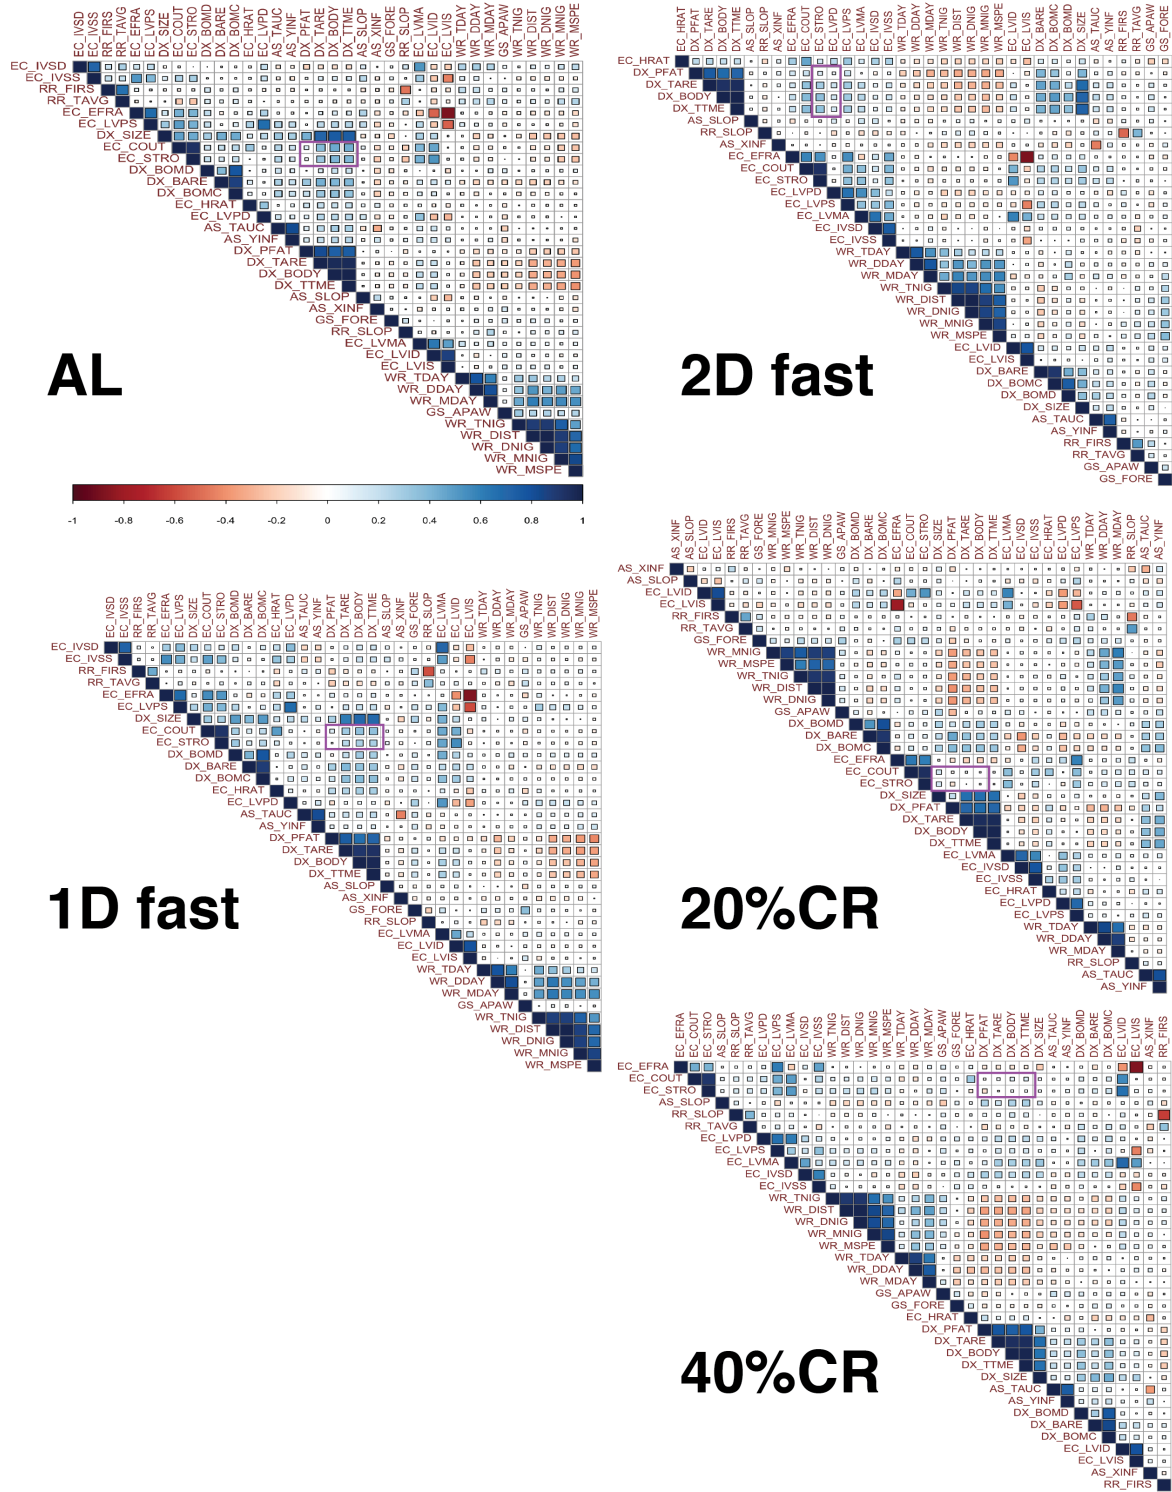

**Figure S3 Diet-specific pairwise phenotypic correlation values.** Size and color of squares represent the positive (blue) or negative (red) correlation values. Purple box highlights pairwise correlations between cardiac output and stroke volume (EC\_COUT, EC\_STRO) and multiple body composition traits (DX\_PFAT, DX\_TARE, DX\_BODY, and DX\_TTME).

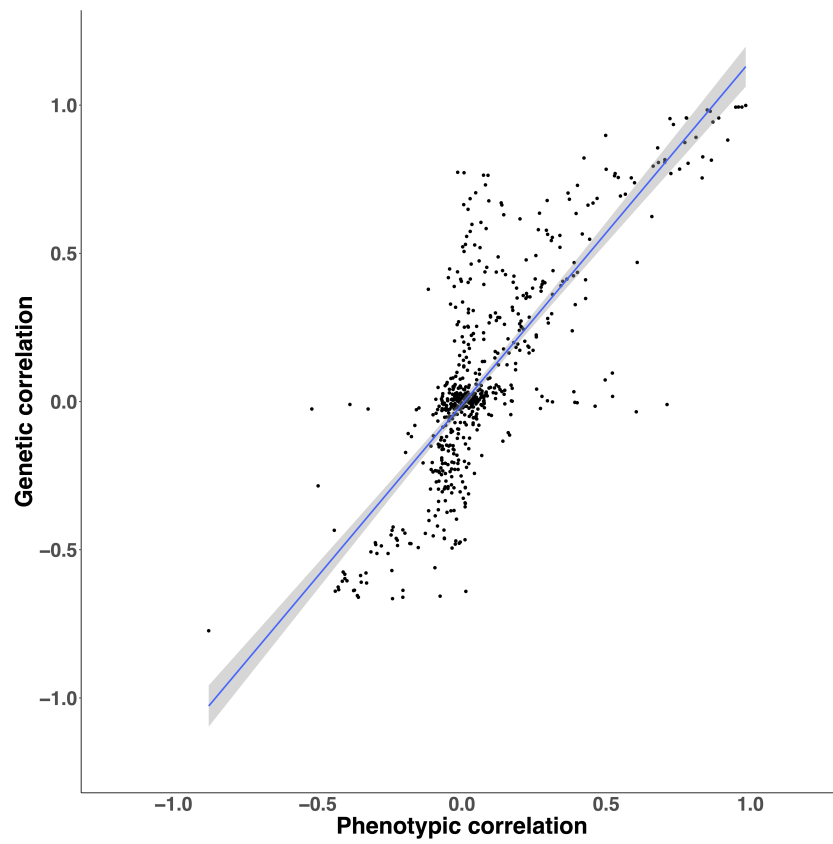

**Figure S4** Scatterplot of phenotypic versus genetic correlations. Grey line depicts linear correlation with 95% CI in shaded area.

## Grip Strength

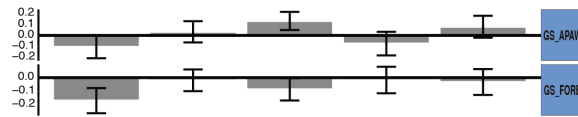

## DEXA

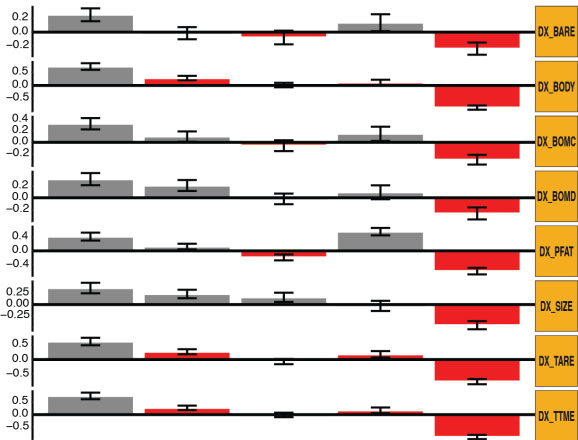

## Rotarod

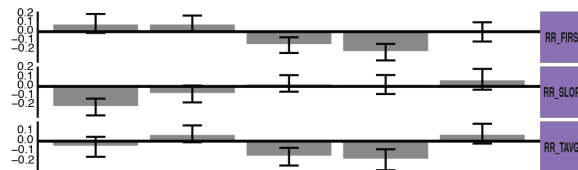

## Acoustic Startle

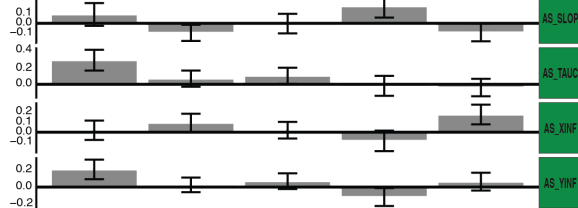

## Wheel Running

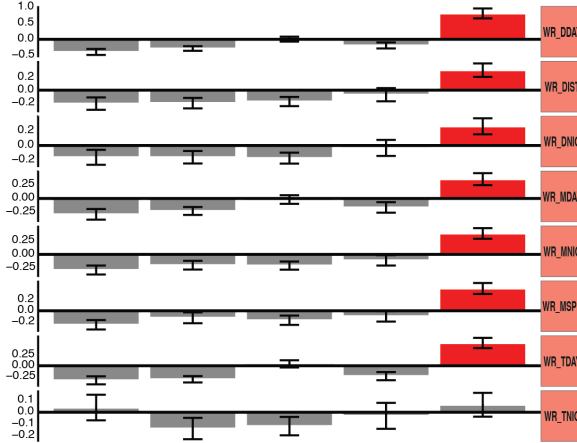

## Echocardiogram

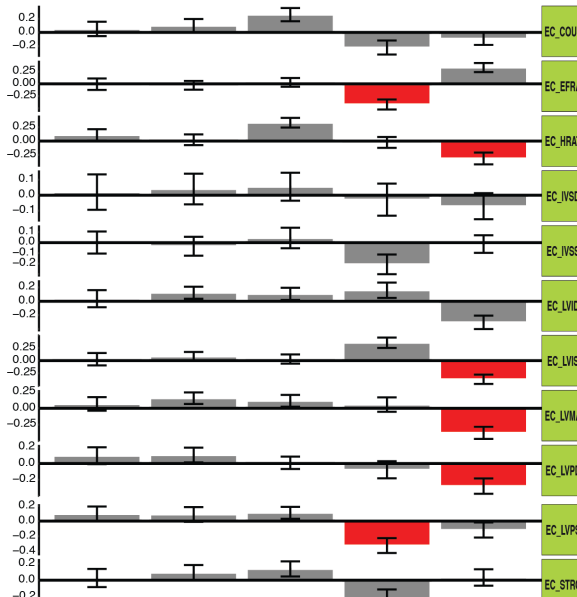

AL 1D 2D 20% 40%

AL 1D 2D 20% 40%

## Dietary Interventions

**Figure S5** Diet specific trait values for the subset of animals with no missing data. Diet specific mean (SE) trait values for all experimental procedures for the subset of animals ( $N = 525$ ) with no missing data across any trait. All trait values were z-score transformed following batch and generation correction. Red bars denote traits that were significantly different from AL diet at a Westfall-Young multiple tests adjusted p-value threshold of 0.05.

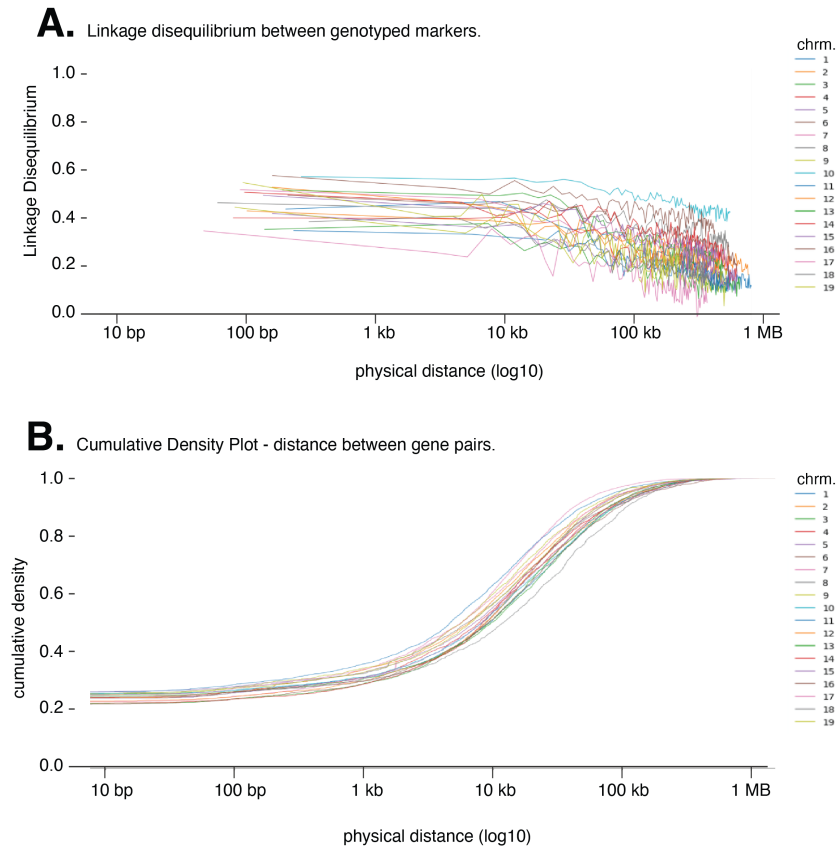

**Figure S6 Linkage disequilibrium per chromosome** A. For each chromosome, we measured linkage disequilibrium (LD) between all genotyped markers. LD was measured as the Pearson correlation value between allele counts (e.g. 0, 1 or 2) at each marker pair. Line plot shows the median LD for all marker pairs binned by physical distance percentiles, interval size 1% B. Cumulative density plot of median pairwise distance between nearest neighbor gene pairs. Pairs binned by physical distance percentiles, interval size 1%.

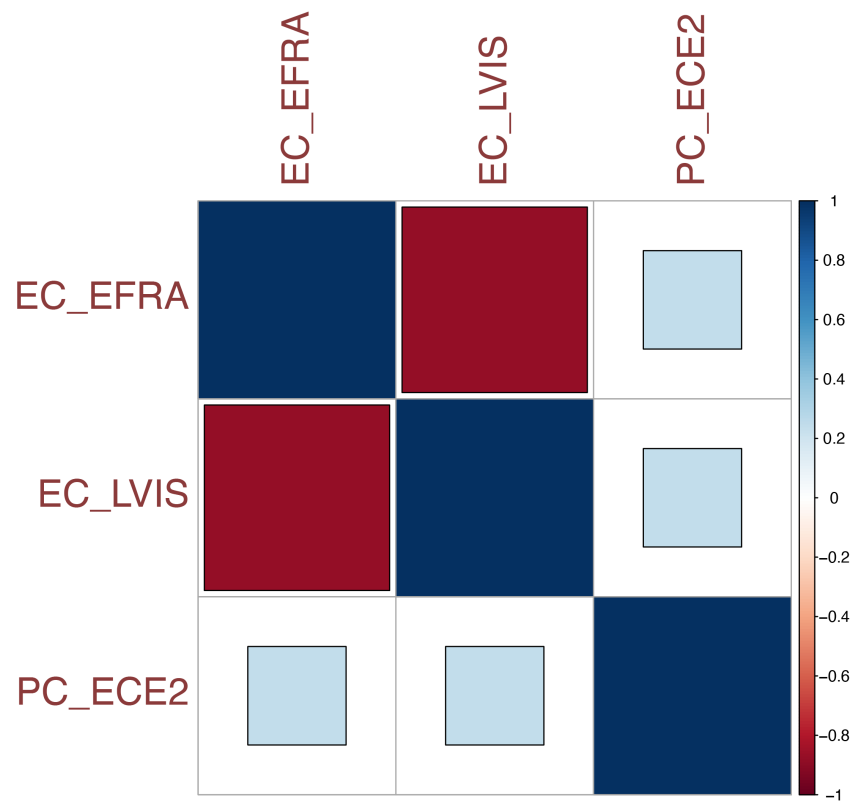

**Figure S7 Pairwise Pearson correlation values.** Correlation between PC\_ECE2 and the two directly measured traits used to calculate this principle component analysis trait: EC\_EFRA and EC\_LVIS.

## A. EC\_LVPS GxD Genetic Mapping

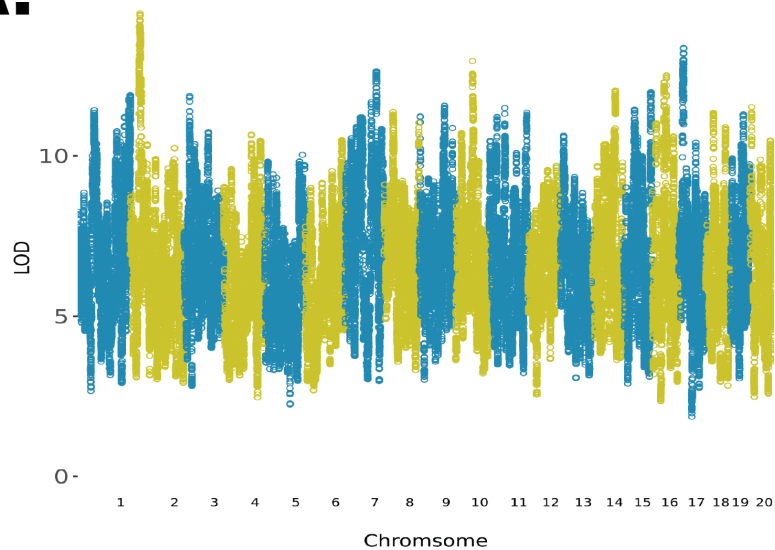

**B.**

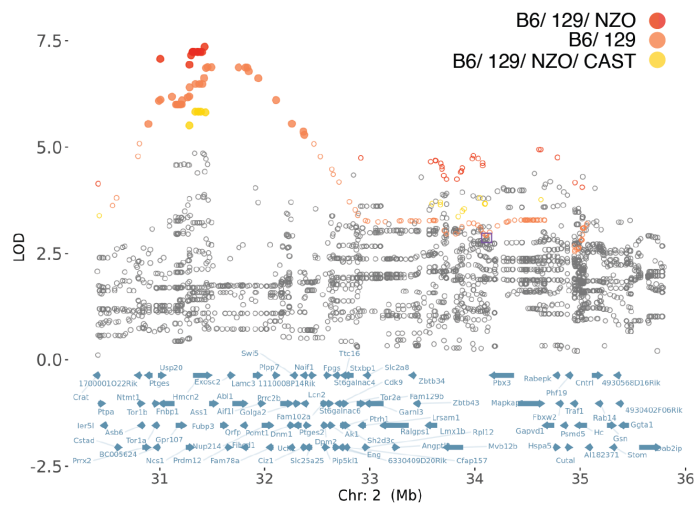

**C.**

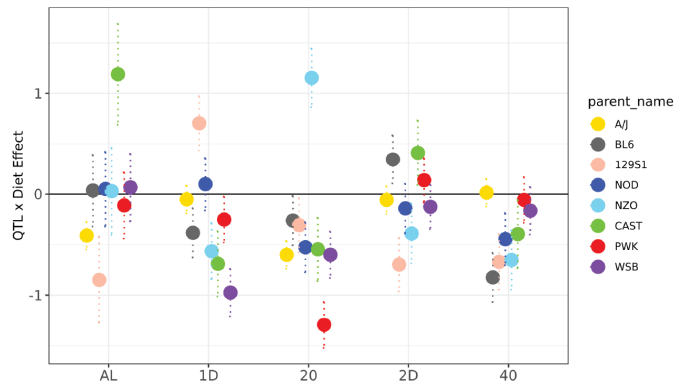

**Figure S8 QTL Mapping for EC\_LVIS.** A. Manhattan plot of diet-dependent genome-wide linkage mapping results for EC\_LVIS. B. Fine-mapping of chromosome 2 locus. Rank 1, 2, and 3 FAP variants shown in red, orange, and yellow circles. C. Diet-specific effect of lead genotyped variant for each of the eight founder variants.
